# Supplementary material
Source: publisher site journal article supplement (https://www.dovepress.com/article/323433)

**Supplementary Materials: Flowchart of Patient Recruitment**


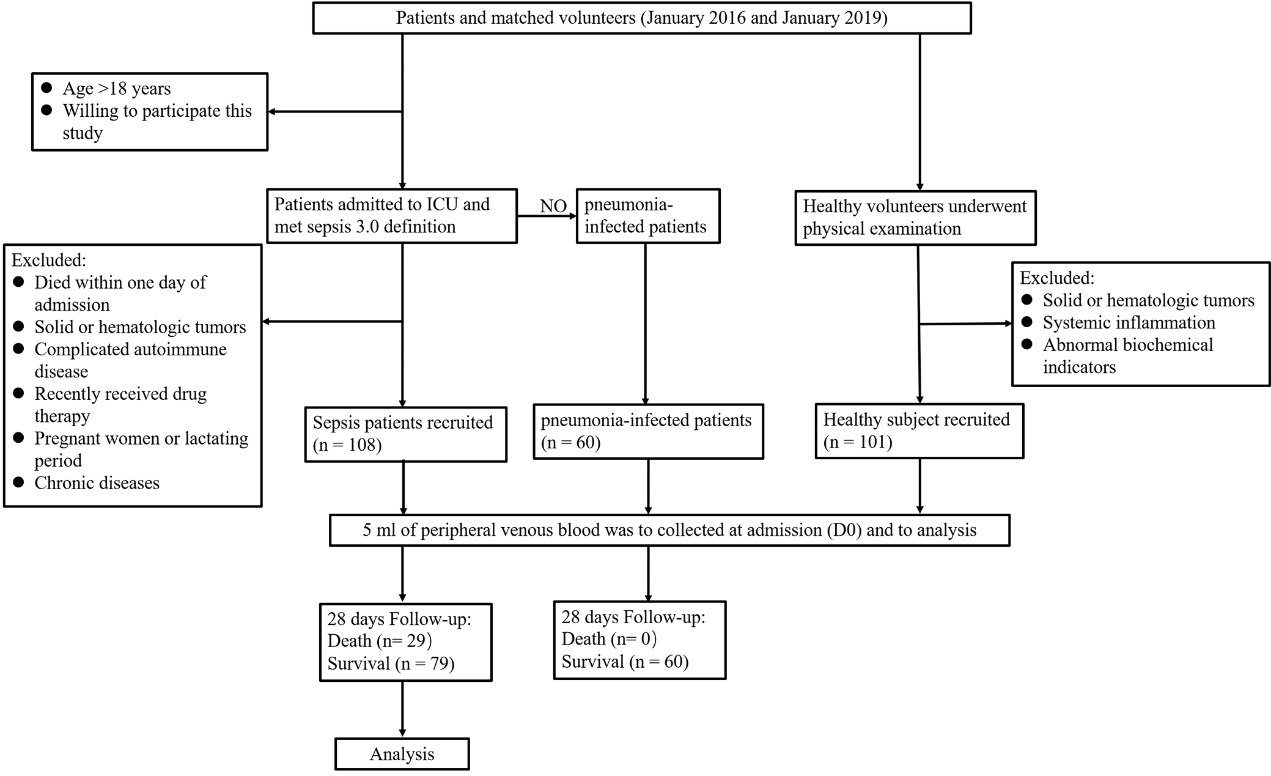

Supplement: Supplementary file 1 [file get_supplementary_file.php]
